# Supplementary material
Source: Springer Nature journal article supplement (https://www.springermedizin.de/resource/supplementary/12986_2013_560_MOESM3_ESM.pdf/25655024)

Glucose  
Fructose

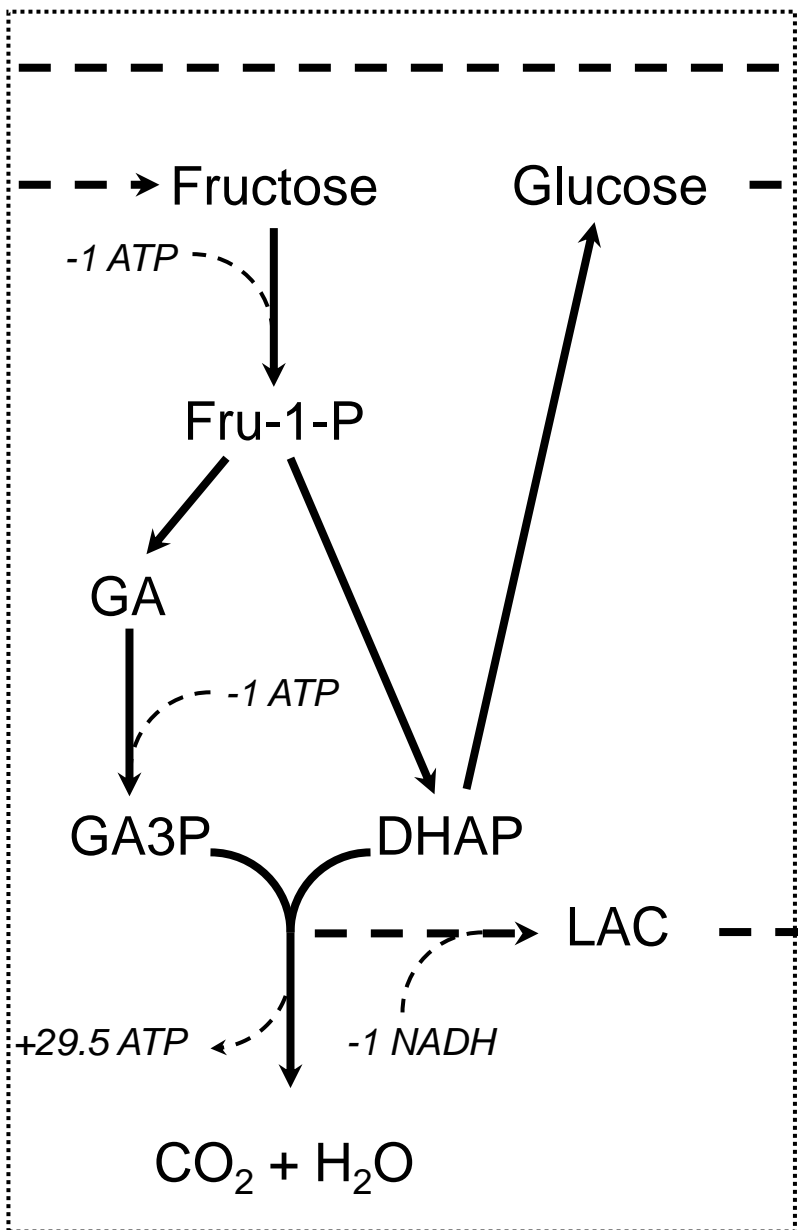

*Hepatocyte*

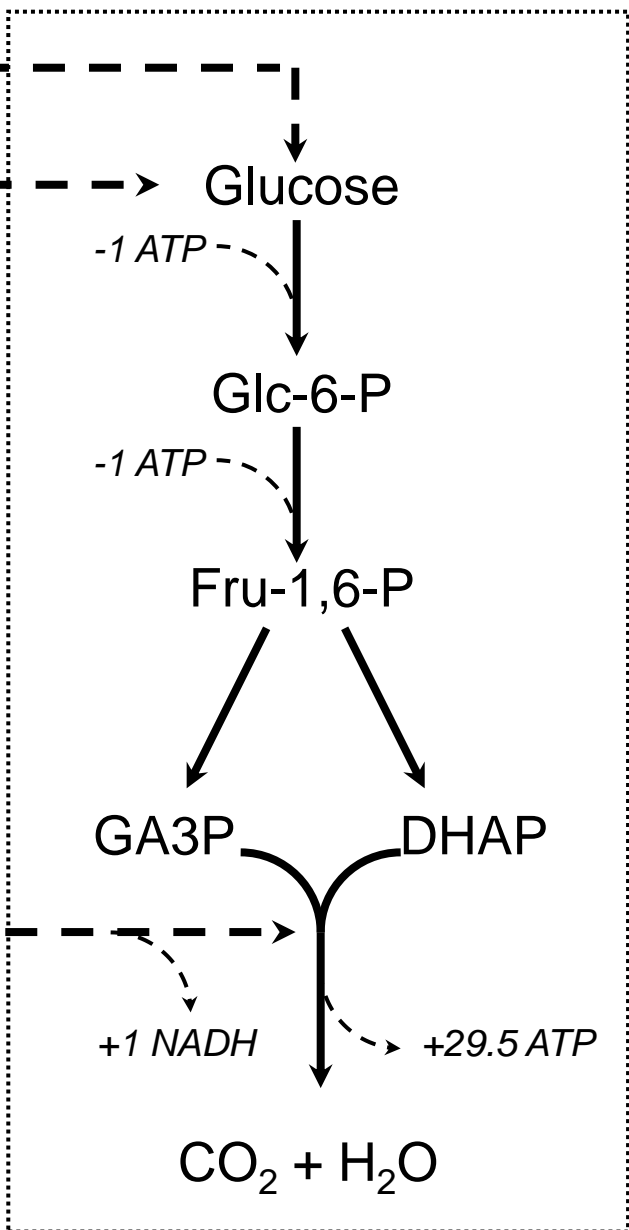

*Extra-hepatic cells*

*Portal  
blood*

Supplement: MOESM3 [file 25655024]
